# Supplementary material for: In Vivo Efficacy of Wound Healing under External (Bio)AgNCs Treatment: Localization Case Study in Liver and Blood Tissue
Source: MDPI journal article supplement (doi:10.3390/ijms24010434), 2022-12-27
Supplement: s1 [file s1]

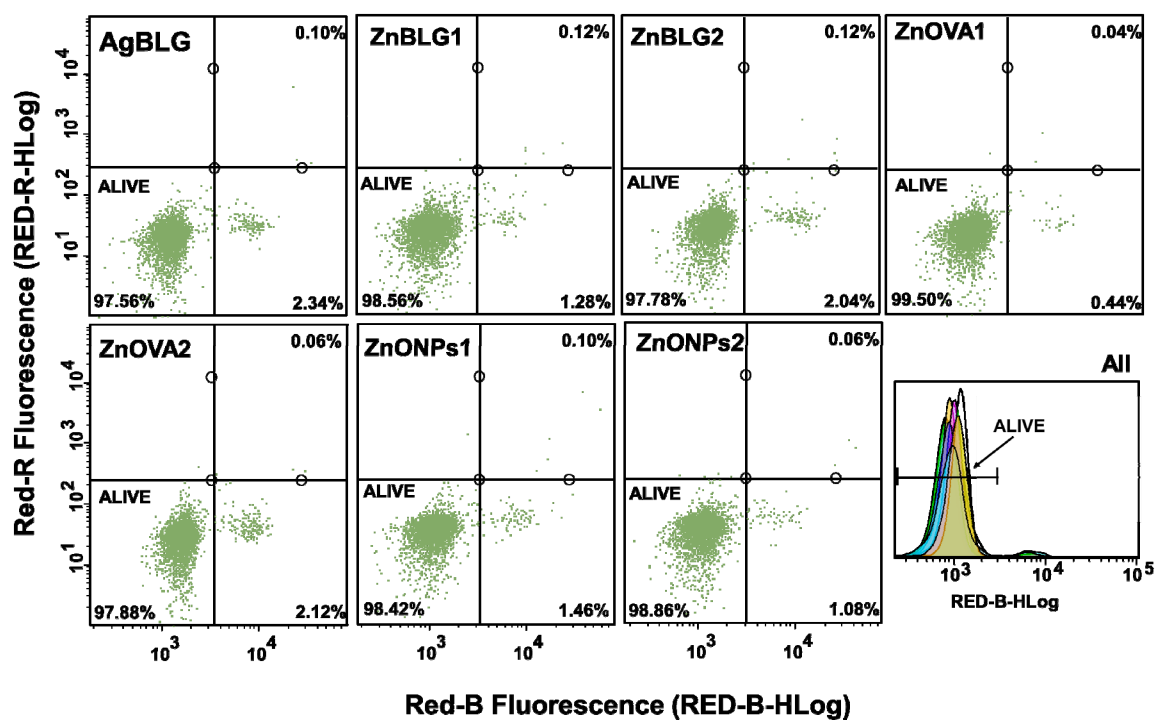

**Figure S1.** Dot plot representation of different nanocomposites synthesized by biological method that.
